# Supplementary material for: Nano-delivery systems for photothermal/starvation therapy and enhanced ferroptosis-immunotherapy
Source: Royal Society of Chemistry journal article supplement (doi:10.1039/d5tb02264a), 2025-01-01
Supplement: d5tb02264a1.pdf [file d5tb02264a1.pdf]

**Nano-delivery systems for photothermal/starvation therapy and enhanced ferroptosis-immunotherapy**

*Lanfu Zheng<sup>1</sup>, Wei Jiang<sup>2</sup>, \* Shuming Tian<sup>1</sup>, Zepeng Feng<sup>1</sup>, Yanan Qi<sup>1</sup>, Hongyang Fu<sup>1</sup>,  
Liting Qi<sup>1</sup>, Lianrui Chen<sup>1</sup>*

<sup>1</sup>Jiamusi University, Jiamusi 154007, China

<sup>2</sup>The First Affiliated Hospital of Jiamusi University, Jiamusi 154007, China

\*Corresponding author at: The First Affiliated Hospital of Jiamusi University, No. 348 Dexiang Street, Jiamusi 154007, P.R. China

Tel +86-13704547007; Email address: 11096057@qq.com.

Supporting Information

**Supporting figures**

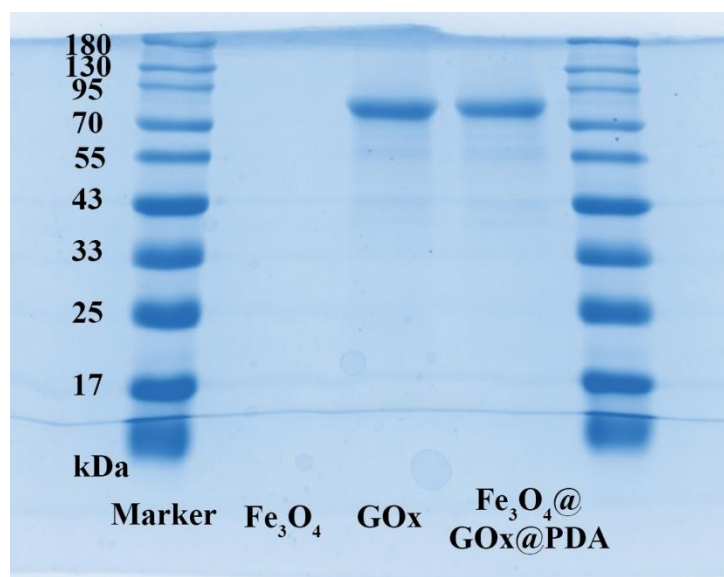

Figure S1 SDS-PAGE gel electrophoresis images of  $\text{Fe}_3\text{O}_4$ , GOx, and  $\text{Fe}_3\text{O}_4@\text{GOx}@PDA$ .

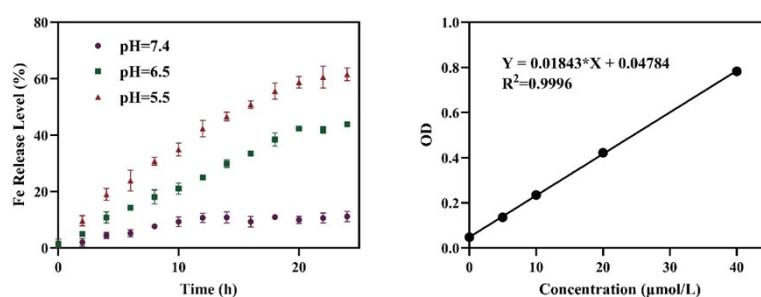

Figure S2 Fe release levels of  $\text{Fe}_3\text{O}_4@\text{GOx}@PDA$  over 24 hours in buffer solutions at pH=7.4, 6.5, and 5.5. Data represent mean  $\pm$  SD, n = 3.

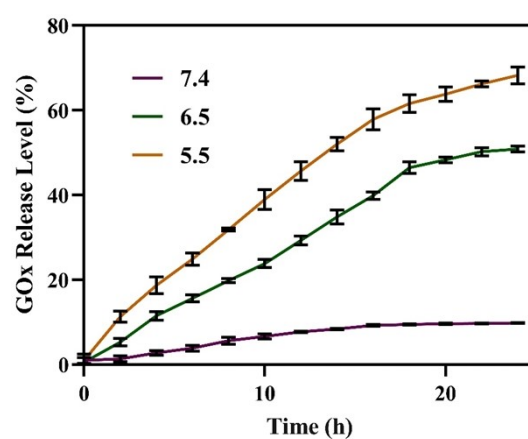

Figure S3 GOx release levels of  $\text{Fe}_3\text{O}_4@\text{GOx}@PDA$  over 24 hours in buffer solutions at pH=7.4, 6.5, and 5.5. Data represent mean  $\pm$  SD, n = 3.

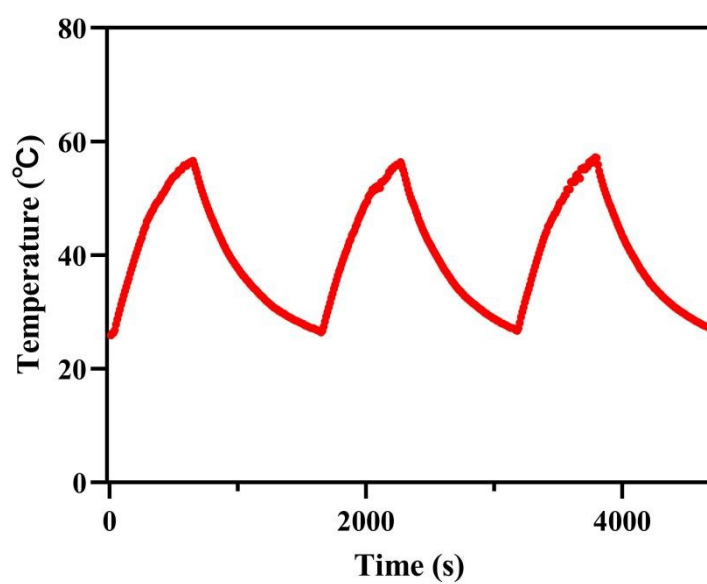

Figure S4 Temperature curve of Fe<sub>3</sub>O<sub>4</sub>@GOx@PDA after three heating-cooling cycles.

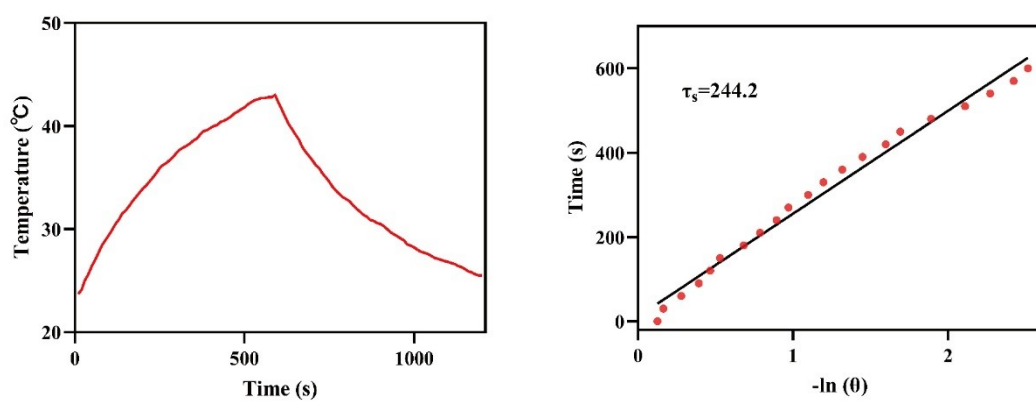

Figure S5 Temperature profiles of Fe<sub>3</sub>O<sub>4</sub>@GOx@PDA with time and linear profiles of  $-\ln(\theta)$  with time during the cooling period.

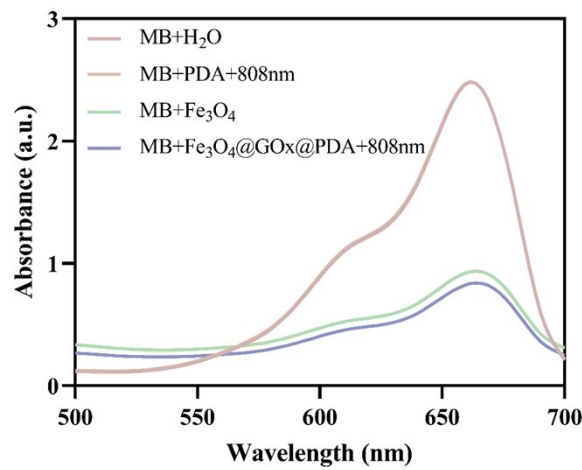

Figure S6 MB detection of H<sub>2</sub>O, PDA+808 nm, Fe<sub>3</sub>O<sub>4</sub>, and Fe<sub>3</sub>O<sub>4</sub>@GOx@PDA+808 nm group ·OH generation.

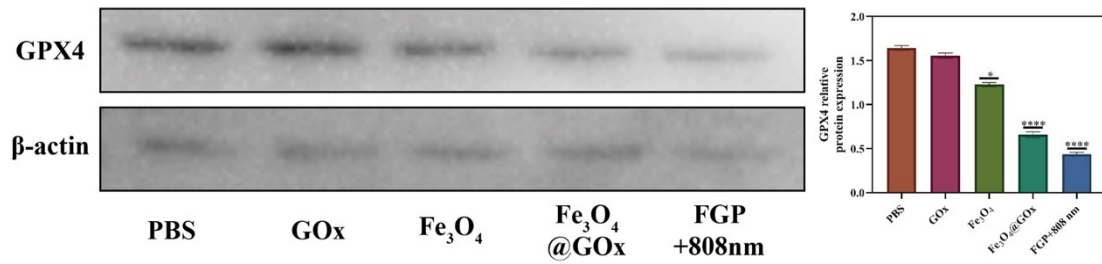

Figure S7 Western blot analysis was performed to detect and quantify GPX4 protein expression in CT26 cells following treatment with different nanomedicines. Data represent mean  $\pm$  SD ( $n = 3$ ; \* $p < 0.05$ , \*\*\* $p < 0.001$ , \*\*\*\* $p < 0.0001$ ).

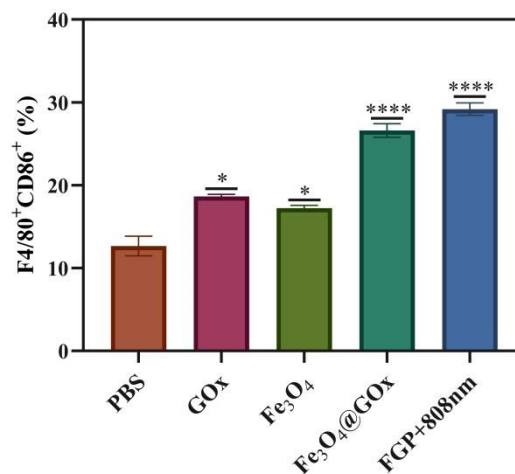

Figure S8 Flow cytometry quantification of M1 macrophage proportion. Data represent mean  $\pm$  SD ( $n = 3$ ; \* $p < 0.05$ , \*\*\*\* $p < 0.0001$ ).

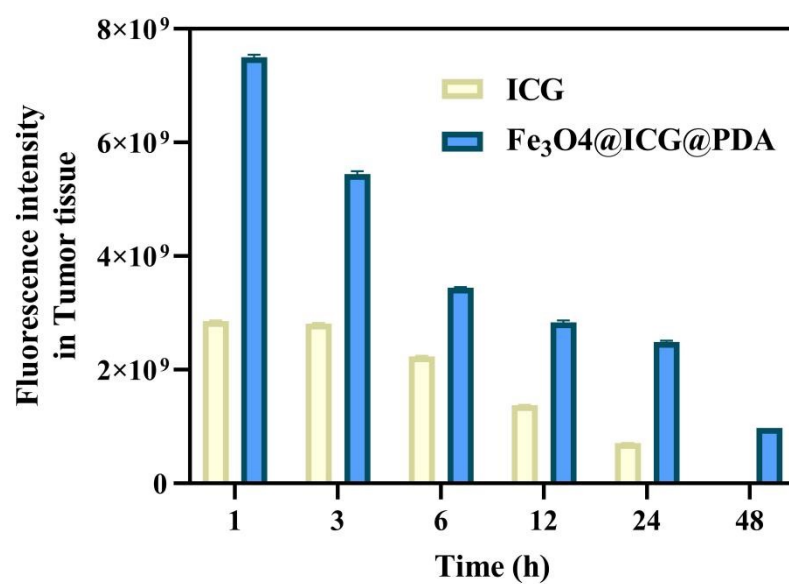

Figure S9 Quantification of fluorescence intensity at tumor sites in mice. Data represent mean  $\pm$

SD, n = 3.

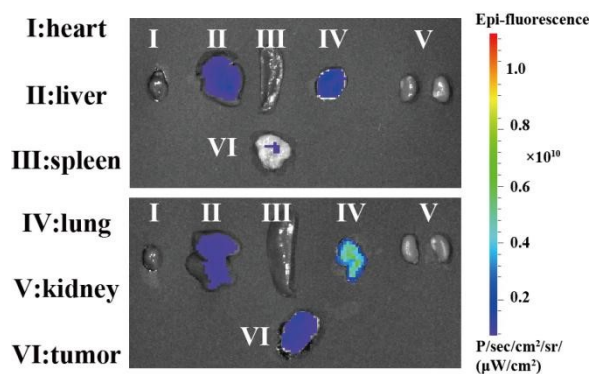

Figure S10 Distribution of  $\text{Fe}_3\text{O}_4@\text{ICG}@\text{PDA}$  in organs.

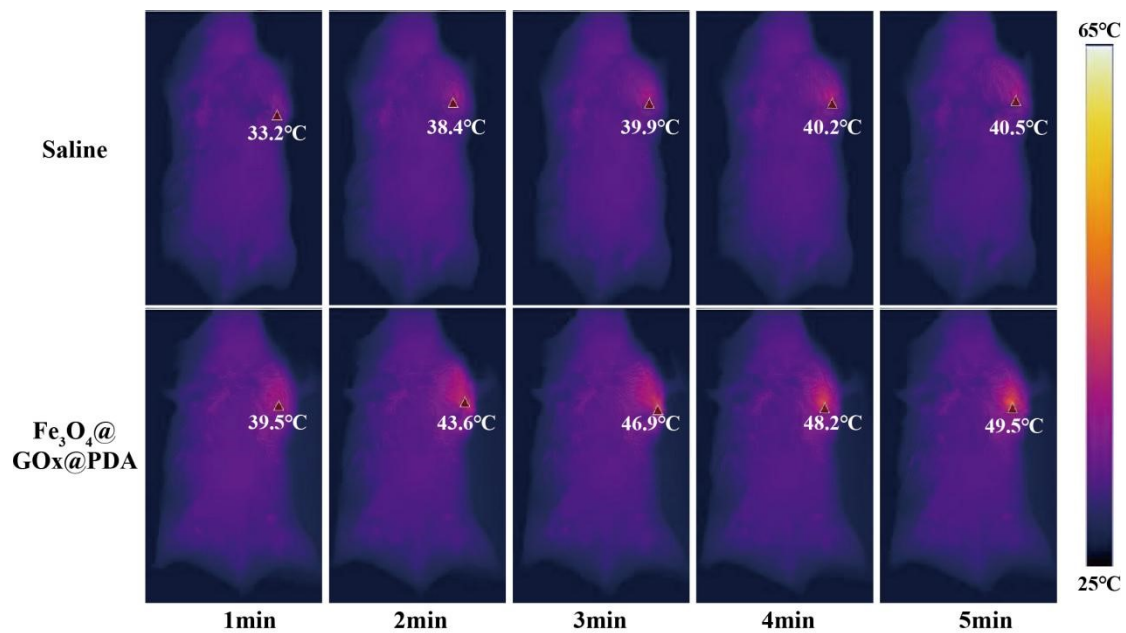

Figure S11 Photothermal imaging in mice.

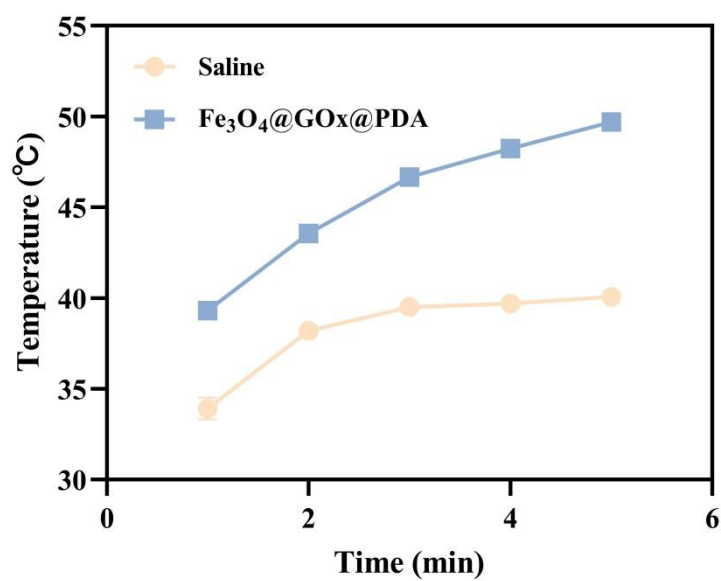

Figure S12 Quantification of photothermal temperature at tumor sites in mice. Data represent mean  $\pm$  SD, n = 3.

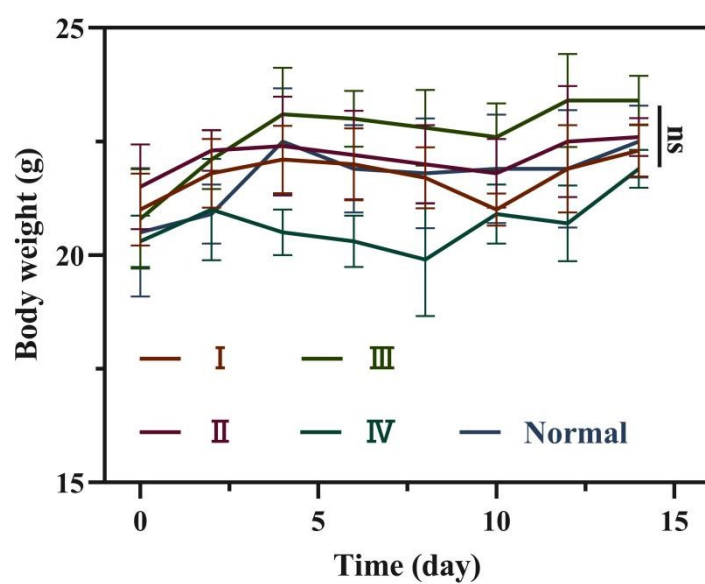

Figure S13 Trend chart of body weight changes in mice after treatment in different groups (I: Saline; (II) GOx, (III) Fe<sub>3</sub>O<sub>4</sub>@GOx, and (IV) Fe<sub>3</sub>O<sub>4</sub>@GOx@PDA + 808 nm laser). Data represent the mean  $\pm$  SD (n = 4, ns: not significant).

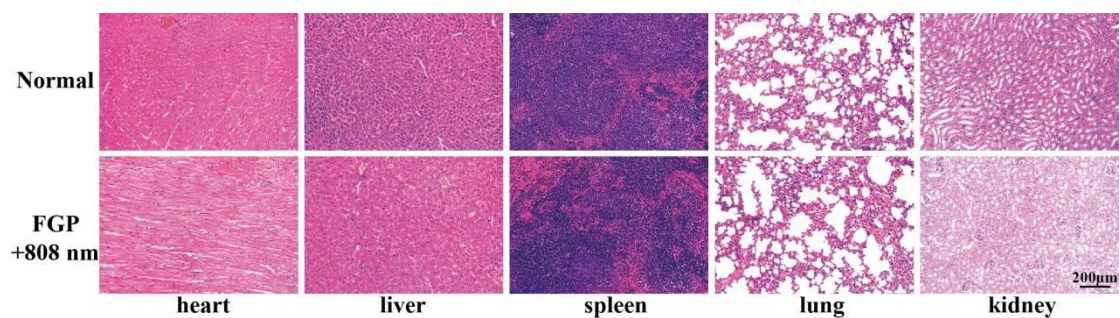

Figure S14 H&E staining results of major organs (heart, liver, spleen, lung, kidney) in mice from the control group and the FGP+808 nm treatment group.

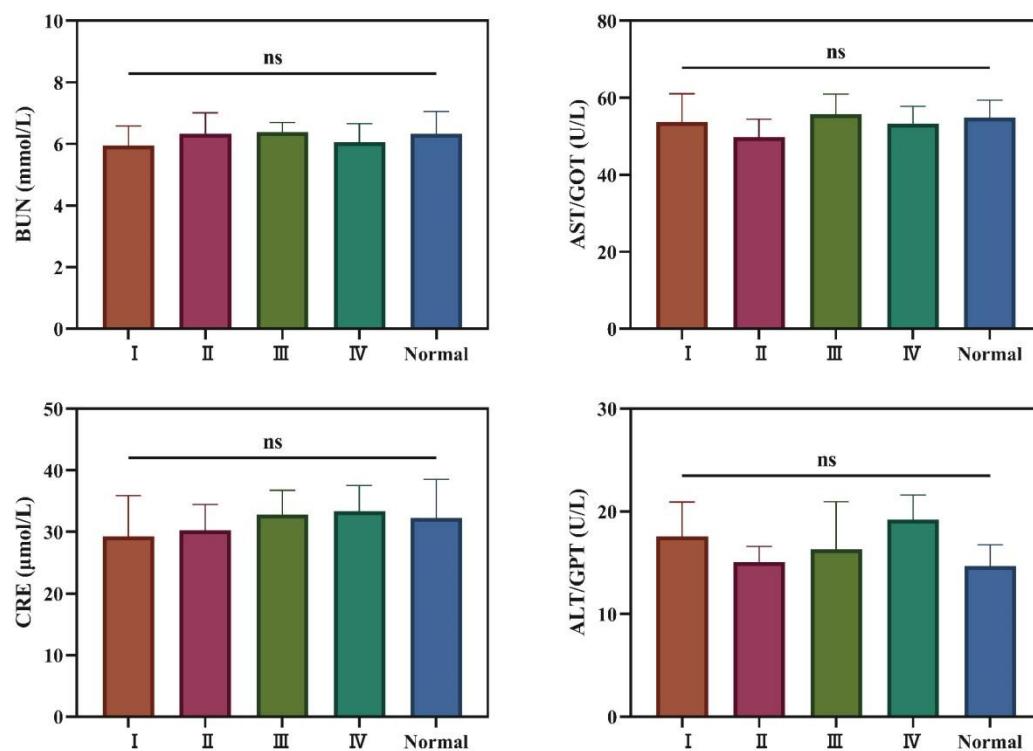

Figure S15 BUN, AST, CRE, and ALT levels were measured in mouse serum (I: Saline; (II) GOx, (III) Fe<sub>3</sub>O<sub>4</sub>@GOx, and (IV) Fe<sub>3</sub>O<sub>4</sub>@GOx@PDA + 808 nm laser). Data represent the mean  $\pm$  SD (n = 4, ns: not significant).

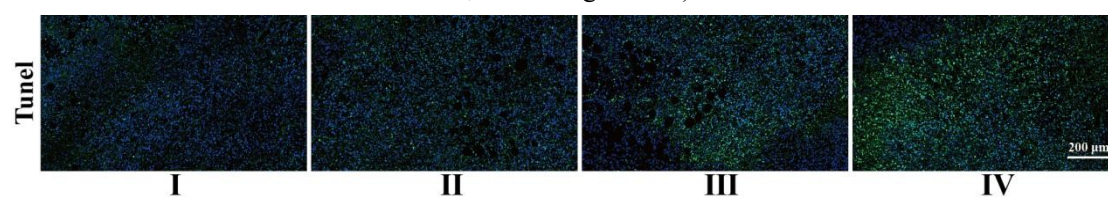

Figure S16 Representative images of TUNEL staining in tumor tissue sections from different groups (I: Saline; (II) GOx, (III) Fe<sub>3</sub>O<sub>4</sub>@GOx, and (IV) Fe<sub>3</sub>O<sub>4</sub>@GOx@PDA + 808 nm laser).
